# Supplementary material for: EndoG Links Bnip3-Induced Mitochondrial Damage and Caspase-Independent DNA Fragmentation in Ischemic Cardiomyocytes
Source: PubMed Central journal article supplement (PMC3060094; doi:10.1371/journal.pone.0017998), 2011-03-17

## Caspase-3-like activity during experimental ischemia

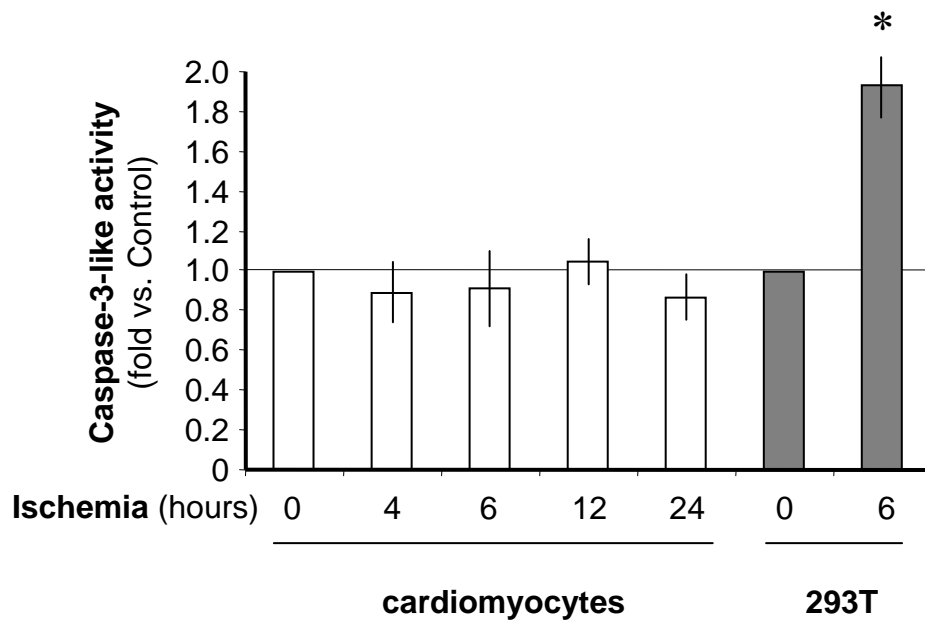

Supplement: pone.0017998.s001.pdf [file pone.0017998.s001.pdf]
