# Supplementary material for: EndoG Links Bnip3-Induced Mitochondrial Damage and Caspase-Independent DNA Fragmentation in Ischemic Cardiomyocytes
Source: PubMed Central journal article supplement (PMC3060094; doi:10.1371/journal.pone.0017998), 2011-03-17

Effect on DNA damage of two shRNA constructs for knockdown of EndoG and Bnip3

a

**EndoG** *Rattus norvegicus* NCBI Reference Sequence: NM\_001034938.1

AtgCGCGCTACGGGCCGGTTTGACCCTGGCGCTGGGCGCCGGCCTGGGCGCCGCGGCAGAGCATTGGCGGCGGCGA  
 GAGGGTAAAGGGCCGGGGCTGCTGGGCCGAGTGCCAGTGTTGCCGGTGTGCGCGCCGATCTTCCCGCGCTGCCGGG  
 GGACCGGCTGGCAGCACCGGAGAGTTGGCCAAGTACGGGCTGCCCGGCTGGCGCAGCTCCGGAGCCGCGAGTCCTAC  
 GTGCTGAGCTACGACCCGCGCACGCGCGGTGCGCTCTGGGTGTTGGAGCAGCTGAGGCCAGAGCGGCTCCGTGGCGAT  
 GGGGACCGTGCGCCTGCGACTTCCACGAGGACGATTCTGTGCACGCGTACCACCGCGCCACCAATGCGGACTACCGC  
 GGCAGTGGCTTTGACCGCGGCCACTTGGCGGCCCGCCAATCACCGCTGGAGTCAGCGGGCCATGGACGACACCTTC  
 TACCTGAGCAACGTAGCGCTCAGGTGCCACACCTCAACCAGCATGCCT**ggaacaaccttgagaagta**cagcc**g**  
**cagcttgactcgaactta**ccaaaacgtttatgtctgcacagggcctcttttctgcccaggaccgaggctgatgg  
 gaagtctatgtgaagtaccagggttattgggaagaaccacgtggcagtgcccacacacttcttcaagggtgttgatcct  
 ggaggcagccagtgggcaaatcgagctgCGTTCCTATGTGATGCCAATGCCCGGTGGATGAGACTCTCCCTTTGGA  
 GCGCTTCTAGTGCCCATCGAGAGCATCGAGCGGGCCTCGGGATTGCTCTTCGTGCCAATATCTGGCTCGAGCTGG  
 AAACCTCAAGGCCATCACTGCTGGTAGCAAGTGA

shRNA-1 shRNA-2

**Bnip3** *Rattus norvegicus* NCBI Reference sequence NM\_053420.3

Atgtcgcagagcggggaggagaacctgcagggctcctgggtagaactgcacttcagcaatgggaatgggagcagcgtt  
 ccagcttccgtctctatttataatgggtgacatggaaaaaataactgctggatgCGCAGCATGAATCTGGACGAAGCAGC  
 TCCAAGAGCTCTCACTGTGACAGCCACCTCGTCCAGACACCACAA**gataccaacagagctgaaata**gacac  
 ccacagctttgggtgagaaaaacagcactctgtctgaggaagattatattgagagaagaagagaagttgaaagtatcct  
 gaagaaaaactcagattggatatgggattggTCAAGTCGGCCAGAAAATGTTCCCCCAAGGAGTTCCTTTTAAACA  
 CCCGAAGCGCACAGCTACTCTCAGCATGA**gaaacacaagcgttatgaa**gaaaggggggtatTTTCTCAGCAGACT  
 TTCTGAAGGTTTTCTTCCATCTCTGTTACTGTCTCATCTGTTAGCCATTGGATTGGGGATCTACATTGGAAGGCGTC  
 TGACAACCTCCACTAG

shRNA-1 shRNA-2

b

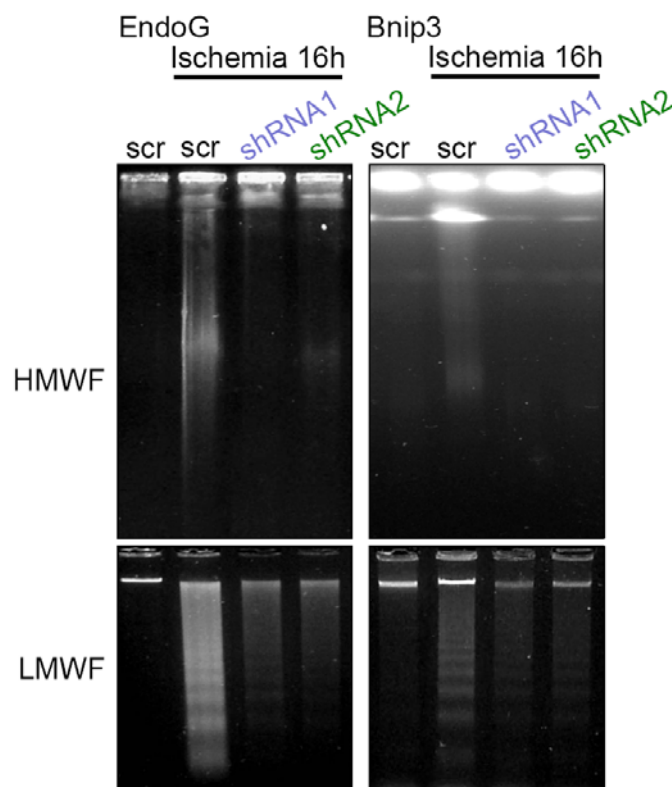

Supplement: pone.0017998.s002.pdf [file pone.0017998.s002.pdf]
