# Supplementary material for: EndoG Links Bnip3-Induced Mitochondrial Damage and Caspase-Independent DNA Fragmentation in Ischemic Cardiomyocytes
Source: PubMed Central journal article supplement (PMC3060094; doi:10.1371/journal.pone.0017998), 2011-03-17

## Assessment of ischemia-induced DNA damage

|              | cardiomyocytes |   |   |   | 293T cells |   |   |   |
|--------------|----------------|---|---|---|------------|---|---|---|
| Ischemia     | -              | - | + | + | -          | - | + | + |
| DMSO         | +              | - | + | - | +          | - | + | - |
| zVAD in DMSO | -              | + | - | + | -          | + | - | + |

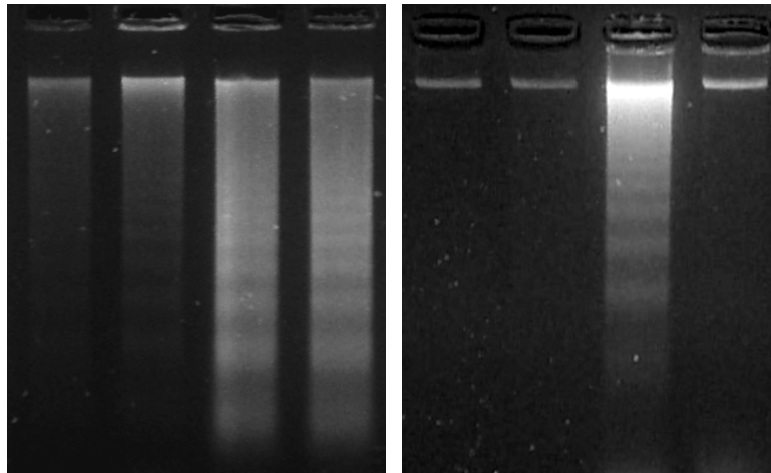

Supplement: pone.0017998.s005.pdf [file pone.0017998.s005.pdf]
